# Supplementary material for: Capillary based Li–air batteries for in situ synchrotron X-ray powder diffraction studies
Source: Royal Society of Chemistry journal article supplement (doi:10.1039/c4ta04291c), 2014-12-16
Supplement: c4ta04291c1.pdf [file c4ta04291c1.pdf]

## Supporting information

### Capillary based Li-air batteries for *in situ* synchrotron X-ray powder diffraction studies

Mie Møller Storm, Rune E. Johnsen, Reza Younesi and Poul Norby  
Department of Energy Conversion and Storage, Technical University of Denmark, Frederiksborgvej  
399, DK-4000 Roskilde, Denmark

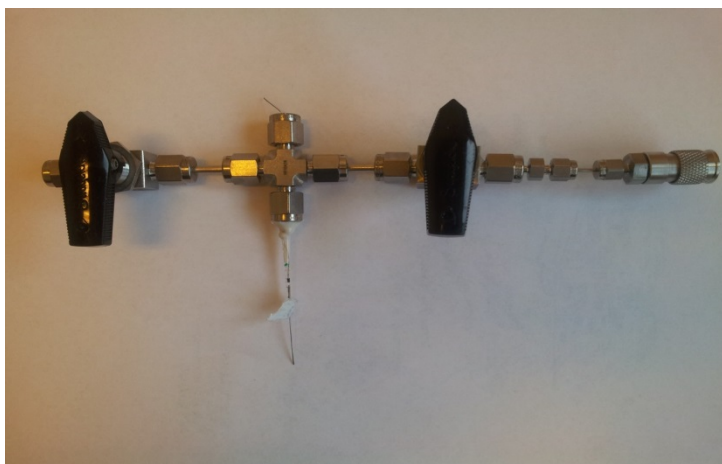

Figure S1: A photo of the capillary battery.

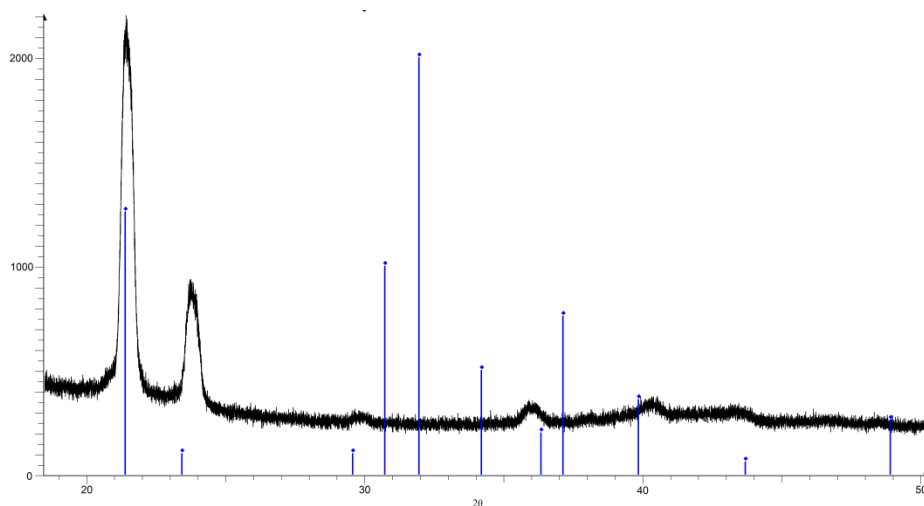

Figure S2: A 5 times discharged cathode. Blue lines: diffraction pattern of Li<sub>2</sub>CO<sub>3</sub>.

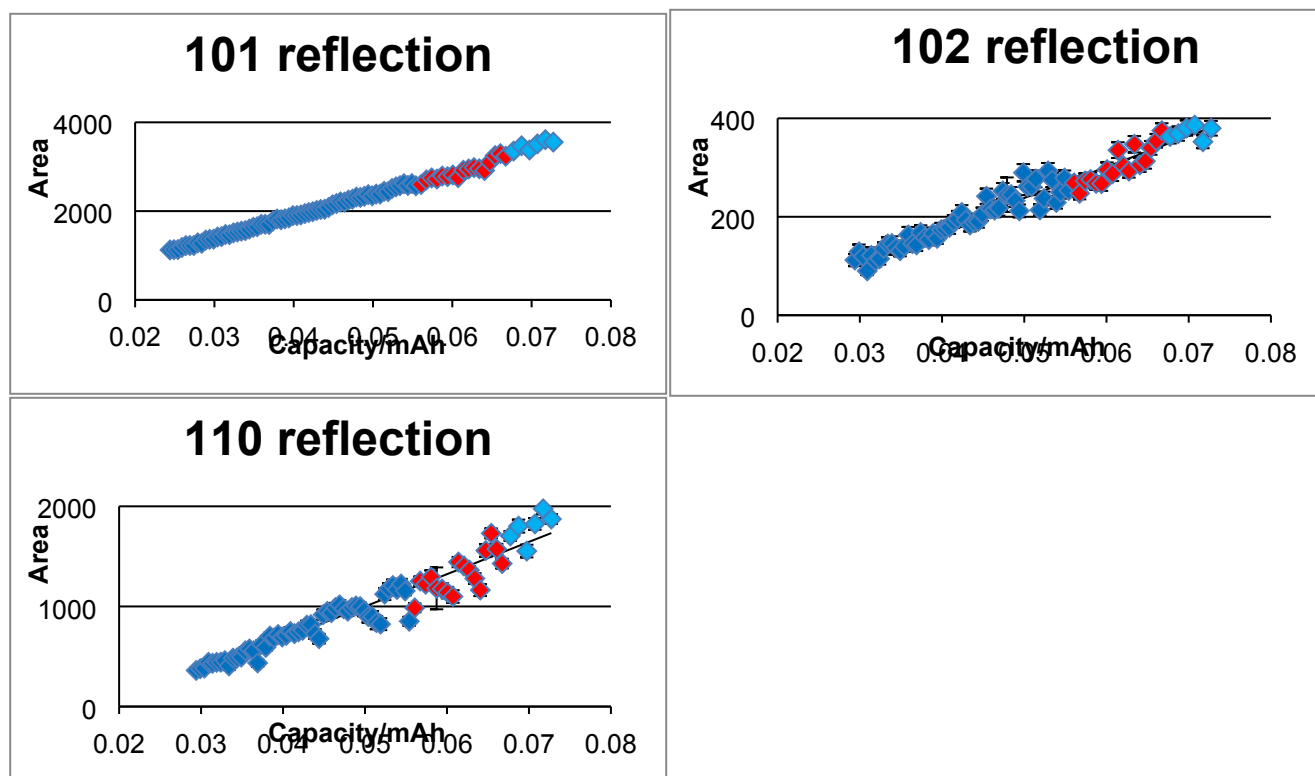

Figure S3: The development of the areas of the reflections as a function of capacity during discharge for the 101, 102 and 110 reflections for battery 1.

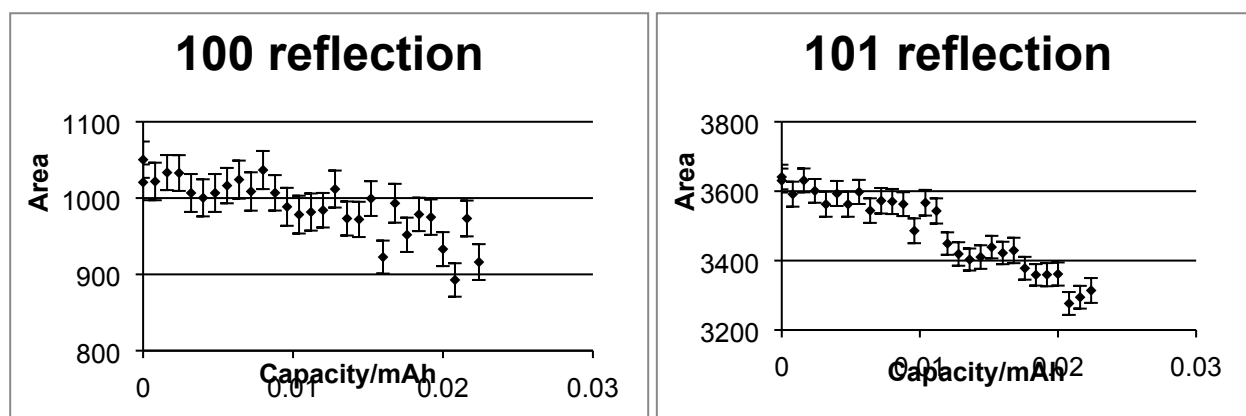

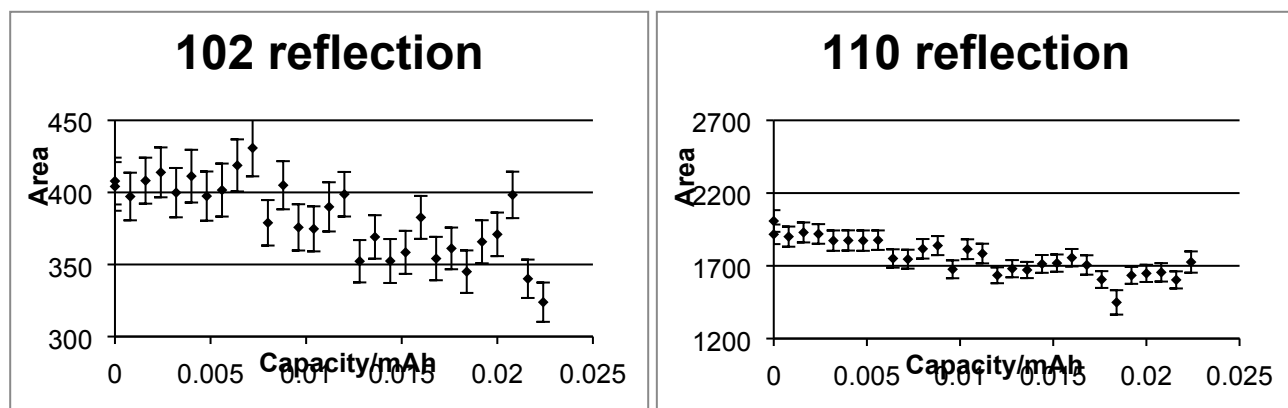

Figure S4: The development of the areas of the reflections for the first charge of battery 1 for the 100, 101, 102 and 110 reflections.

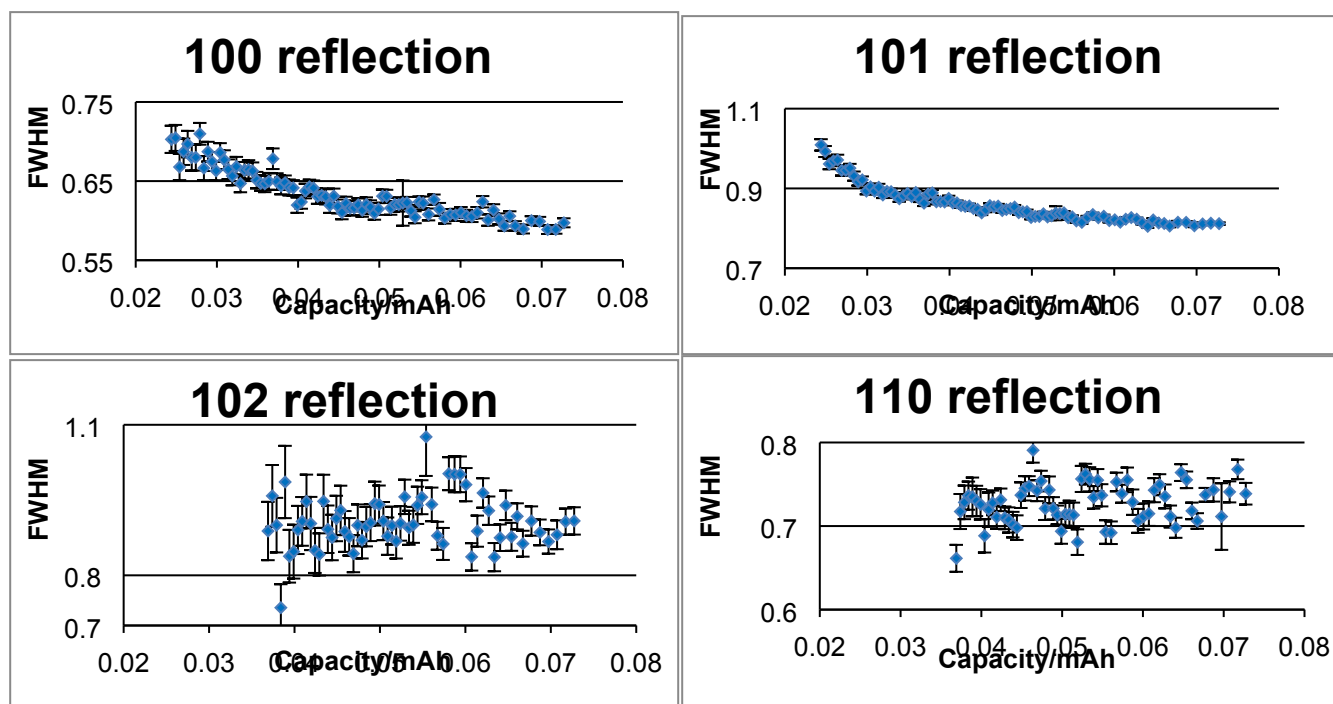

Figure S5: The development of the FWHM during discharge of battery 1 for the 100, 101, 102 and 110 reflections.

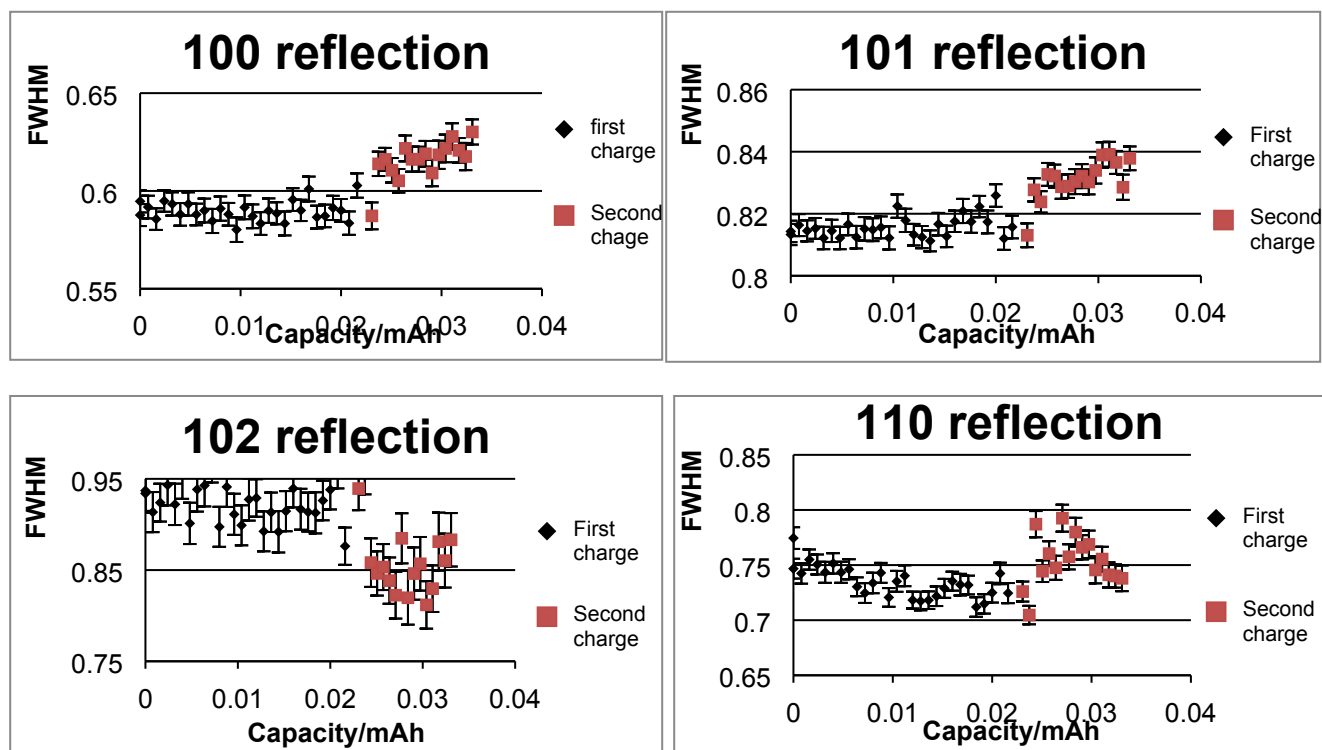

Figure S6: The development of the FWHM during charging of battery 1 for the 100, 101, 102 and 110 reflections.

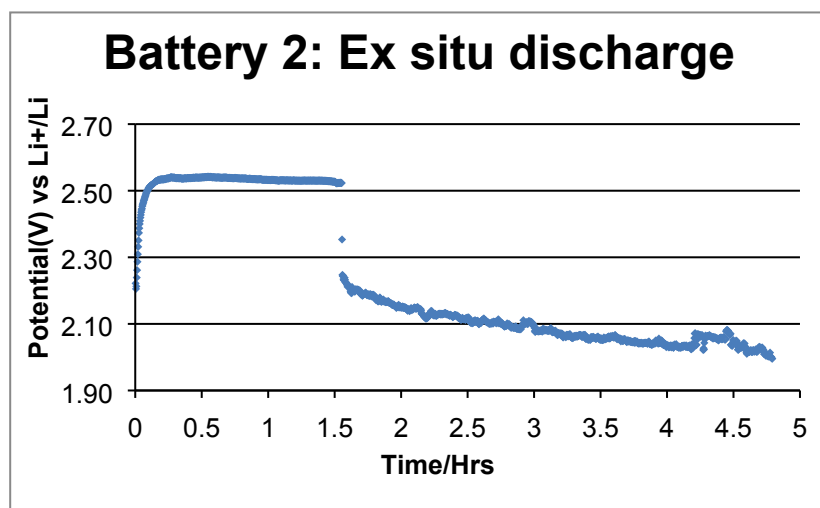

Figure S7: The discharge curve of battery 2

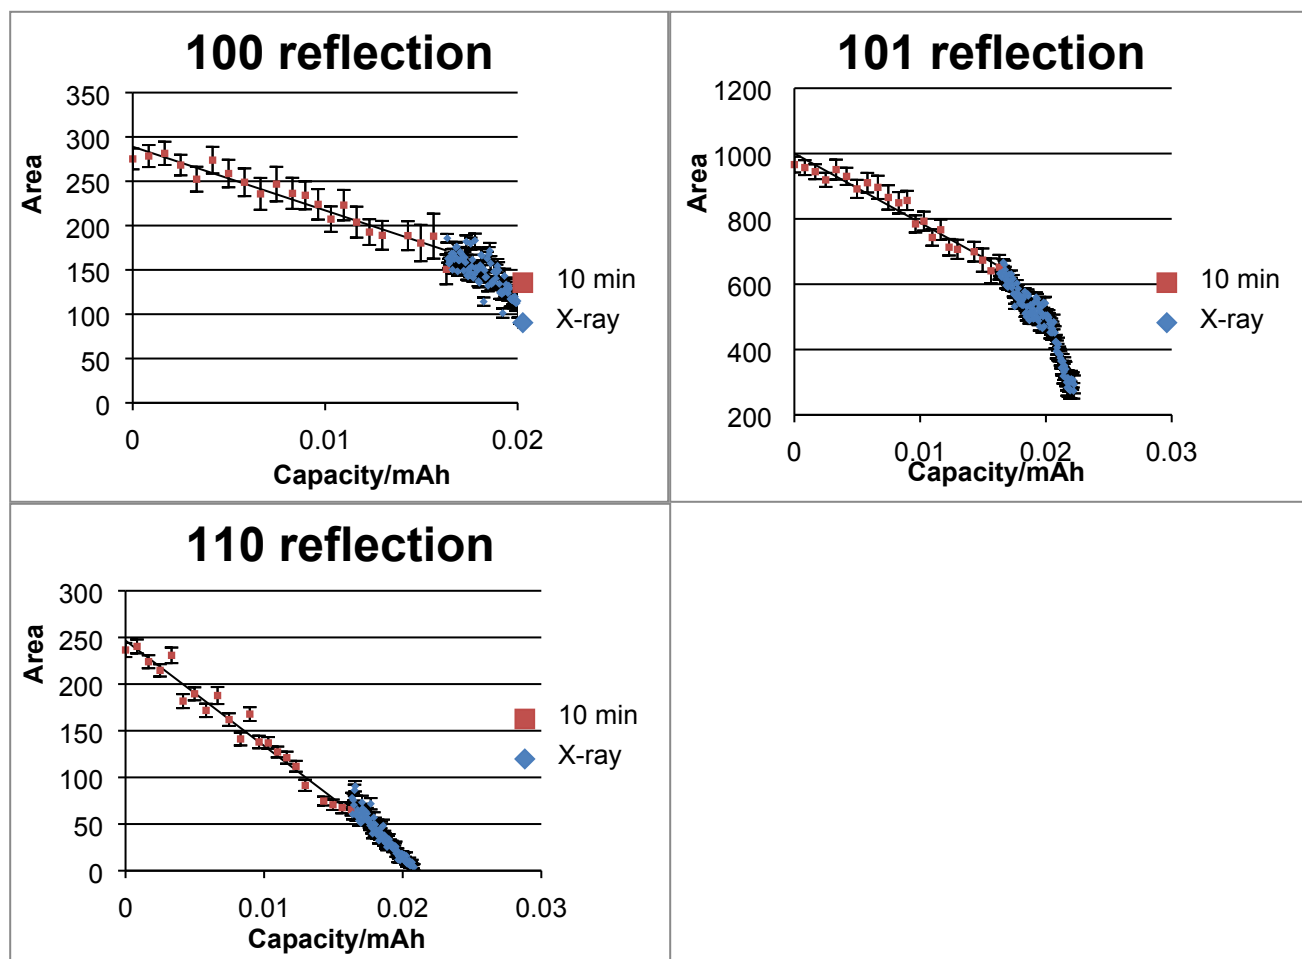

Figure S8: The decomposition of the  $\text{Li}_2\text{O}_2$  reflections in battery 2 as a function of capacity, depending on a 10 minutes exposure to X-ray or constant X-ray exposure. The left equation is for the 10 minutes measurements and the right equation is for the constant X-ray exposure.

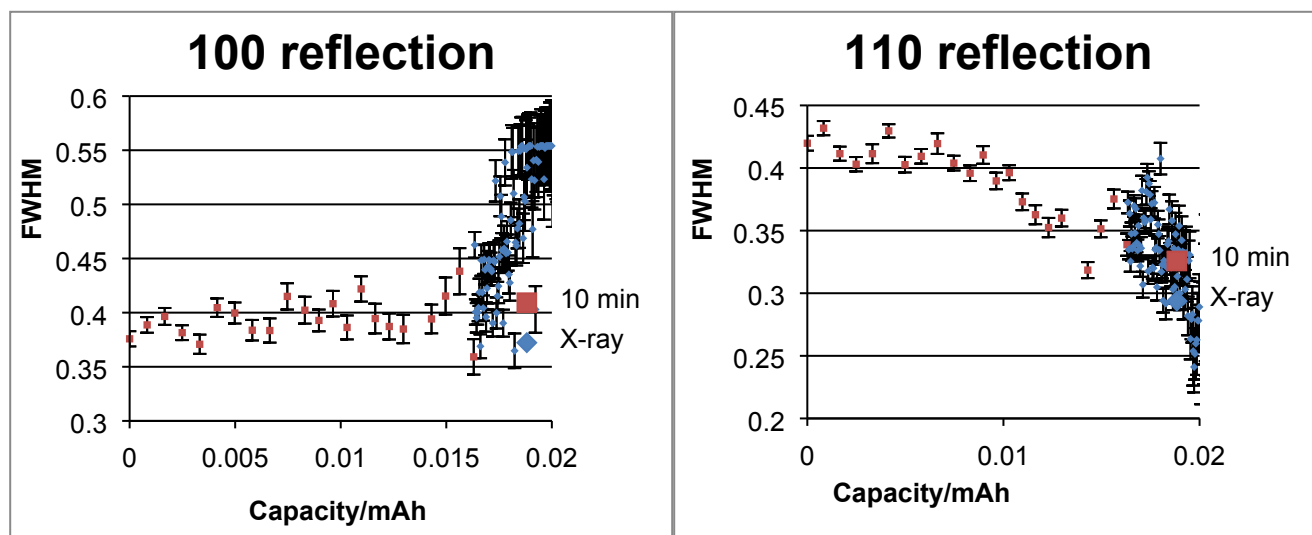

Figure S9: The development of the FWHM for battery 2, both with and without constant X-ray exposure. The upper limit reached for the 100 reflections is due to the fitting procedure for the data.

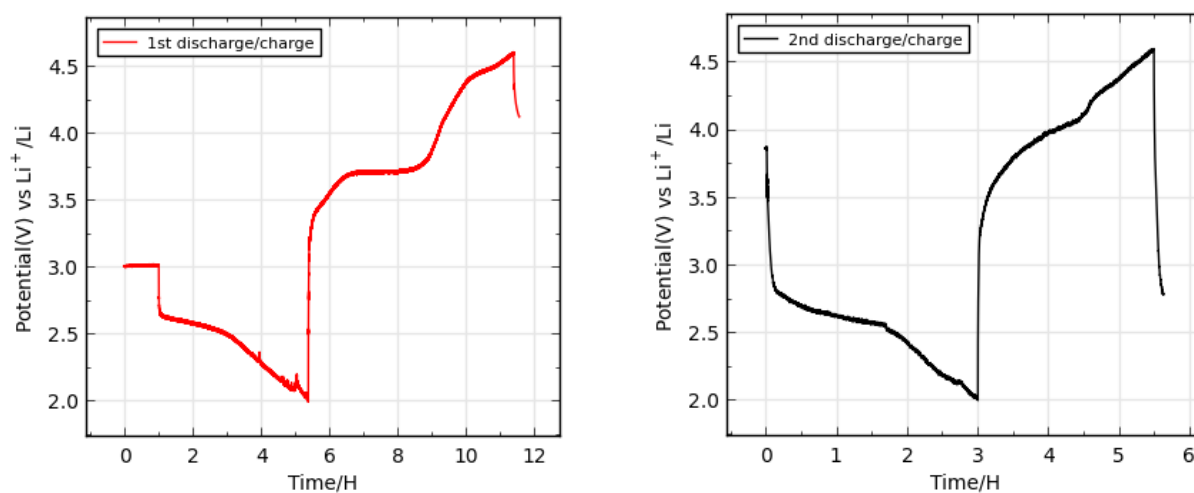

Figure S10: Left: The 1<sup>st</sup> discharge/charge curves of battery 3 measured at 4  $\mu\text{A}$ . Right: The 2<sup>nd</sup> discharge/charge curves of battery 3 measured at 5 and 6  $\mu\text{A}$ .

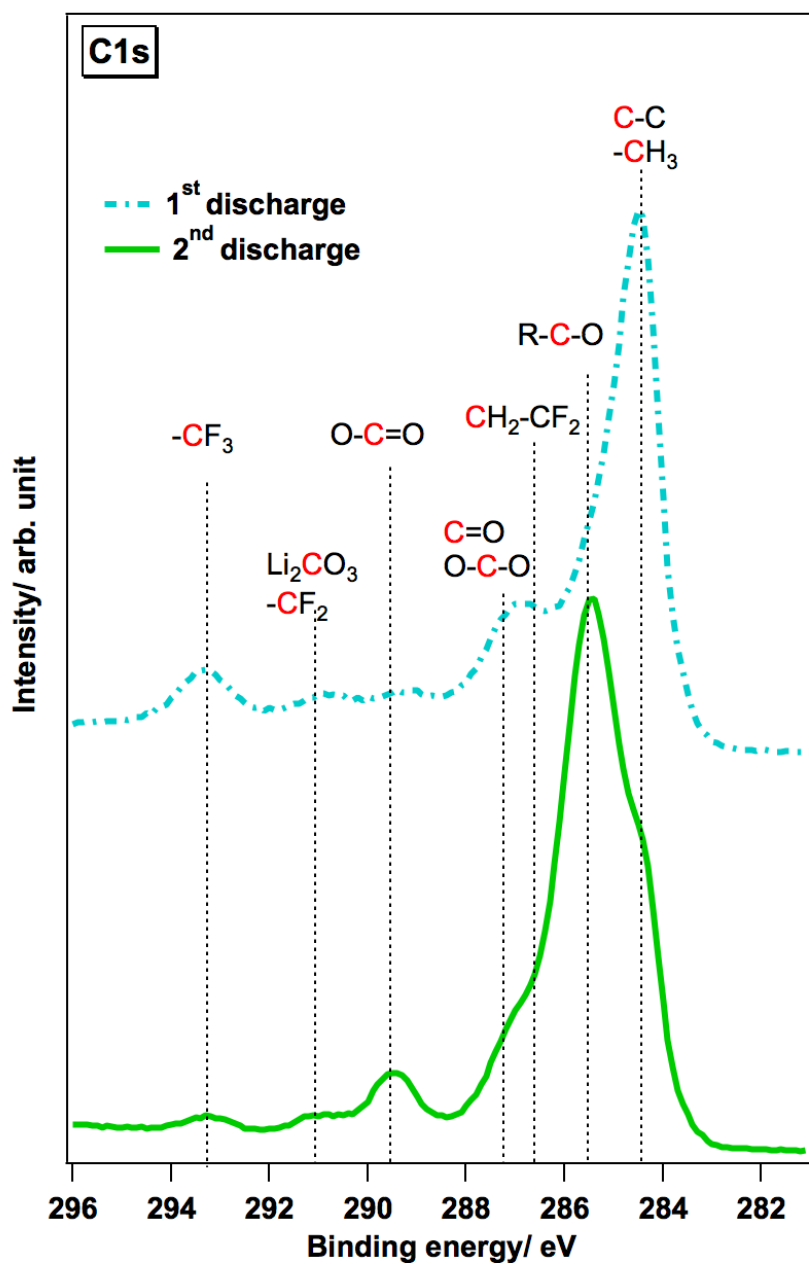

Figure S11: The C1s spectra of *ex situ* analyzed cathodes after 1<sup>st</sup> discharge (blue/-.-.) or 2<sup>nd</sup> discharge (green/—) in the capillary Li-O<sub>2</sub> battery.
